# Supplementary material for: Strain-Level Diversity of Secondary Metabolism in Streptomyces albus
Source: PubMed Central journal article supplement (PMC4312078; doi:10.1371/journal.pone.0116457), 2015-01-30
Supplement: pone.0116457.s001.pdf [file pone.0116457.s001.pdf]

| OTU ID | Organisms                                               |                                                         |                             |                         |                        |                         |                  |
|--------|---------------------------------------------------------|---------------------------------------------------------|-----------------------------|-------------------------|------------------------|-------------------------|------------------|
| 1      | <i>M. tuberculosis</i> H37Rv                            |                                                         |                             |                         |                        |                         |                  |
| 2      | <i>S. acidiscabies</i> 84104                            |                                                         |                             |                         |                        |                         |                  |
| 3      | <i>S. afghaniensis</i> 772                              | <i>S. chartreusis</i> NRRL 12338                        |                             |                         |                        |                         |                  |
| 4      | <i>S. albulus</i> CCRC 11814                            | <i>S. albulus</i> PD1                                   |                             |                         |                        |                         |                  |
| 5      | <i>S. albus</i> J1074                                   | <i>S. sp.</i> PVA 9407                                  | <i>S. sp.</i> GBA 9410      | <i>S. sp.</i> PPC42     | <i>S. sp.</i> SM8      | <i>S. sp.</i> LaPpAH202 | <i>S. sp.</i> S4 |
| 6      | <i>S. aurantiacus</i> JA 4570 Seq90                     |                                                         |                             |                         |                        |                         |                  |
| 7      | <i>S. auratus</i> AGR0001                               |                                                         |                             |                         |                        |                         |                  |
| 8      | <i>S. avermitilis</i> MA4680                            |                                                         |                             |                         |                        |                         |                  |
| 9      | <i>S. bingchenggensis</i> BCW-1                         |                                                         |                             |                         |                        |                         |                  |
| 10     | <i>S. cattleya</i> NRRL 8057                            |                                                         |                             |                         |                        |                         |                  |
| 11     | <i>S. clavuligerus</i> ATCC 27064                       |                                                         |                             |                         |                        |                         |                  |
| 12     | <i>S. coelicoflavus</i> ZG0656                          | <i>S. lividans</i> 1326                                 | <i>S. coelicolor</i> A3(2)  | <i>S. sp.</i> FXJ7.023  |                        |                         |                  |
| 13     | <i>S. collinus</i> Tu 365                               |                                                         |                             |                         |                        |                         |                  |
| 14     | <i>S. davawensis</i> JCM 4913                           |                                                         |                             |                         |                        |                         |                  |
| 15     | <i>S. exfoliatus</i> DSM 41693                          |                                                         |                             |                         |                        |                         |                  |
| 16     | <i>S. flavidovirens</i> DSM 40150                       |                                                         |                             |                         |                        |                         |                  |
| 17     | <i>S. flavogriseus</i> ATCC 33331                       | <i>S. sp.</i> PAMC26508                                 |                             |                         |                        |                         |                  |
| 18     | <i>S. ghanaensis</i> ATCC 14672                         | <i>S. viridosporus</i> T7A                              |                             |                         |                        |                         |                  |
| 19     | <i>S. griseoaurantiacus</i> M045                        |                                                         |                             |                         |                        |                         |                  |
| 20     | <i>S. griseoflavus</i> Tu4000                           |                                                         |                             |                         |                        |                         |                  |
| 21     | <i>S. griseus</i> subsp. <i>griseus</i> NBRC 13350      | <i>S. griseus</i> XylebKG1                              | <i>S. sp.</i> W007          |                         |                        |                         |                  |
| 22     | <i>S. himastatinicus</i> ATCC 53653                     |                                                         |                             |                         |                        |                         |                  |
| 23     | <i>S. hygrosopicus</i> subsp. <i>jinggangensis</i> 5008 | <i>S. hygrosopicus</i> subsp. <i>jinggangensis</i> TL01 |                             |                         |                        |                         |                  |
| 24     | <i>S. ipomoeae</i> 9103                                 |                                                         |                             |                         |                        |                         |                  |
| 25     | <i>S. mobaraensis</i> NBRC 13819                        |                                                         |                             |                         |                        |                         |                  |
| 26     | <i>S. pristinaespiralis</i> ATCC 25486                  |                                                         |                             |                         |                        |                         |                  |
| 27     | <i>S. prunicolor</i> NBRC 13075                         |                                                         |                             |                         |                        |                         |                  |
| 28     | <i>S. purpureus</i> KA281                               |                                                         |                             |                         |                        |                         |                  |
| 29     | <i>S. rapamycinicus</i> NRRL 5491                       |                                                         |                             |                         |                        |                         |                  |
| 30     | <i>S. rimosus</i> subsp. <i>rimosus</i> ATCC 10970      |                                                         |                             |                         |                        |                         |                  |
| 31     | <i>S. roseochromogenes</i> subsp. <i>oscitans</i>       |                                                         |                             |                         |                        |                         |                  |
| 32     | <i>S. roseosporus</i> NRRL 15998                        | <i>S. roseosporus</i> NRRL 11379                        | <i>S. globisporus</i> C1027 | <i>S. sp.</i> HCCB10043 |                        |                         |                  |
| 33     | <i>S. scabies</i> 87.22                                 | <i>S. bottropensis</i> ATCC 25435                       |                             |                         |                        |                         |                  |
| 34     | <i>S. somaliensis</i> DSM 40738                         |                                                         |                             |                         |                        |                         |                  |
| 35     | <i>S. sp.</i> 142MFC03.1                                |                                                         |                             |                         |                        |                         |                  |
| 36     | <i>S. sp.</i> 303MFC05.2                                |                                                         |                             |                         |                        |                         |                  |
| 37     | <i>S. sp.</i> 351MFTsu5.1                               |                                                         |                             |                         |                        |                         |                  |
| 38     | <i>S. sp.</i> AA0539                                    |                                                         |                             |                         |                        |                         |                  |
| 39     | <i>S. sp.</i> AA1529                                    |                                                         |                             |                         |                        |                         |                  |
| 40     | <i>S. sp.</i> ATexABD23                                 |                                                         |                             |                         |                        |                         |                  |
| 41     | <i>S. sp.</i> BoleA5                                    |                                                         |                             |                         |                        |                         |                  |
| 42     | <i>S. sp.</i> CNB091                                    |                                                         |                             |                         |                        |                         |                  |
| 43     | <i>S. sp.</i> CNH099                                    |                                                         |                             |                         |                        |                         |                  |
| 44     | <i>S. sp.</i> CNH189                                    |                                                         |                             |                         |                        |                         |                  |
| 45     | <i>S. sp.</i> CNQ329                                    | <i>S. sp.</i> CNT371                                    | <i>S. sp.</i> CNQ865        |                         |                        |                         |                  |
| 46     | <i>S. sp.</i> CNR698                                    | <i>S. sp.</i> CNS615                                    | <i>S. sp.</i> CNT302        |                         |                        |                         |                  |
| 47     | <i>S. sp.</i> CNS335                                    |                                                         |                             |                         |                        |                         |                  |
| 48     | <i>S. sp.</i> CNT360                                    |                                                         |                             |                         |                        |                         |                  |
| 49     | <i>S. sp.</i> CNT372                                    |                                                         |                             |                         |                        |                         |                  |
| 50     | <i>S. sp.</i> CNY228                                    |                                                         |                             |                         |                        |                         |                  |
| 51     | <i>S. sp.</i> CNY243                                    |                                                         |                             |                         |                        |                         |                  |
| 52     | <i>S. sp.</i> DpondAAB6                                 |                                                         |                             |                         |                        |                         |                  |
| 53     | <i>S. sp.</i> DvalAA83                                  | <i>S. sp.</i> SirexAA-E                                 |                             |                         |                        |                         |                  |
| 54     | <i>S. sp.</i> e14                                       | <i>S. sp.</i> Amel2xE9                                  |                             |                         |                        |                         |                  |
| 55     | <i>S. sp.</i> FxanaC1                                   |                                                         |                             |                         |                        |                         |                  |
| 56     | <i>S. sp.</i> FxanaD5                                   | <i>S. gancidicus</i> BKS 1315                           |                             |                         |                        |                         |                  |
| 57     | <i>S. sp.</i> HGB0020                                   |                                                         |                             |                         |                        |                         |                  |
| 58     | <i>S. sp.</i> HmicA12                                   |                                                         |                             |                         |                        |                         |                  |
| 59     | <i>S. sp.</i> HPH0547                                   |                                                         |                             |                         |                        |                         |                  |
| 60     | <i>S. sp.</i> KhCrAH340                                 | <i>S. sp.</i> KhCrAH244                                 | <i>S. sp.</i> KhCrAH337     | <i>S. sp.</i> KhCrAH40  | <i>S. sp.</i> LaPpAH95 | <i>S. sp.</i> LaPpAH165 |                  |
| 61     | <i>S. sp.</i> LaPpAH108                                 |                                                         |                             |                         |                        |                         |                  |
| 62     | <i>S. sp.</i> Mg1                                       |                                                         |                             |                         |                        |                         |                  |
| 63     | <i>S. sp.</i> MspMPM5                                   |                                                         |                             |                         |                        |                         |                  |
| 64     | <i>S. sp.</i> PsTaAH124                                 |                                                         |                             |                         |                        |                         |                  |
| 65     | <i>S. sp.</i> SA3 actF                                  | <i>S. sp.</i> SPB78                                     | <i>S. sp.</i> Tu6071        |                         |                        |                         |                  |
| 66     | <i>S. sp.</i> ScaeMPe10                                 | <i>S. fulvissimus</i> DSM 40593                         | <i>S. sp.</i> Wigar10       | <i>S. sp.</i> CcalMP8W  |                        |                         |                  |
| 67     | <i>S. sp.</i> SPB74                                     |                                                         |                             |                         |                        |                         |                  |
| 68     | <i>S. sp.</i> SS                                        |                                                         |                             |                         |                        |                         |                  |
| 69     | <i>S. sp.</i> TAA486                                    |                                                         |                             |                         |                        |                         |                  |
| 70     | <i>S. sp.</i> TOR3209                                   |                                                         |                             |                         |                        |                         |                  |
| 71     | <i>S. sulphureus</i> DSM 40104                          |                                                         |                             |                         |                        |                         |                  |
| 72     | <i>S. sulphureus</i> L180                               |                                                         |                             |                         |                        |                         |                  |
| 73     | <i>S. sviceus</i> ATCC 29083                            | <i>S. canus</i> 299MFChir4.1                            |                             |                         |                        |                         |                  |
| 74     | <i>S. thermophilacinus</i> SPC6                         |                                                         |                             |                         |                        |                         |                  |
| 75     | <i>S. tsukubaensis</i> NRRL18488                        |                                                         |                             |                         |                        |                         |                  |
| 76     | <i>S. turgidiscabies</i> Car8                           |                                                         |                             |                         |                        |                         |                  |
| 77     | <i>S. venezuelae</i> ATCC 10712                         |                                                         |                             |                         |                        |                         |                  |
| 78     | <i>S. violaceusniger</i> Tü 4113                        |                                                         |                             |                         |                        |                         |                  |
| 79     | <i>S. viridochromogenes</i> DSM 40736                   |                                                         |                             |                         |                        |                         |                  |
| 80     | <i>S. viridochromogenes</i> Tü 57                       |                                                         |                             |                         |                        |                         |                  |
| 81     | <i>S. vitaminophilus</i> DSM 41686                      |                                                         |                             |                         |                        |                         |                  |
| 82     | <i>S. xinghaiensis</i> S187                             |                                                         |                             |                         |                        |                         |                  |
| 83     | <i>S. zinciresistens</i> K42                            |                                                         |                             |                         |                        |                         |                  |
