# Supplementary material for: Strain-Level Diversity of Secondary Metabolism in Streptomyces albus
Source: PubMed Central journal article supplement (PMC4312078; doi:10.1371/journal.pone.0116457), 2015-01-30
Supplement: pone.0116457.s002.pdf [file pone.0116457.s002.pdf]

| Predicted biosynthetic system         | Predicted product | <i>S. albus</i> J1074 coordinates | <i>S. sp.</i> SM8 | <i>S. sp.</i> LaPpAH-202 | <i>S. sp.</i> S4 |
|---------------------------------------|-------------------|-----------------------------------|-------------------|--------------------------|------------------|
| NRPS                                  | Gramicidin-like   | 3877105..3982798                  | NZ_AMPN01000069.1 | NZ_KB890724.1            |                  |
|                                       |                   |                                   | NZ_AMPN01000380.1 | NZ_KB890722.1            |                  |
|                                       |                   |                                   | NZ_AMPN01000067.1 |                          |                  |
|                                       |                   |                                   | NZ_AMPN01000316.1 |                          |                  |
|                                       |                   |                                   | NZ_AMPN01000031.1 |                          |                  |
| Type I PKS                            | Candicidin        | 6566408..6721648                  | NZ_AMPN01000181.1 | NZ_KB890733.1            | CADY01000095.1   |
|                                       |                   |                                   | NZ_AMPN01000212.1 | NZ_KB890720.1            | CADY01000094.1   |
|                                       |                   |                                   | NZ_AMPN01000210.1 | NZ_KB890721.1            | CADY01000093.1   |
|                                       |                   |                                   | NZ_AMPN01000209.1 | NZ_KB890728.1            | CADY01000092.1   |
|                                       |                   |                                   | NZ_AMPN01000314.1 | NZ_KB890710.1            | CADY01000091.1   |
|                                       |                   |                                   | NZ_AMPN01000380.1 |                          |                  |
|                                       |                   |                                   | NZ_AMPN01000177.1 |                          |                  |
|                                       |                   |                                   | NZ_AMPN01000337.1 |                          |                  |
|                                       |                   |                                   | NZ_AMPN01000338.1 |                          |                  |
|                                       |                   |                                   | NZ_AMPN01000339.1 |                          |                  |
| Hybrid NRPS / PKS                     | Antimycin         | 6730563..6755198                  | NZ_AMPN01000050.1 |                          |                  |
|                                       |                   |                                   | NZ_AMPN01000430.1 |                          |                  |
|                                       |                   |                                   | NZ_AMPN01000462.1 |                          |                  |
|                                       |                   |                                   | NZ_AMPN01000393.1 |                          |                  |
| NRPS                                  | Unknown           | 6755272..6776675                  | NZ_AMPN01000393.1 |                          |                  |
|                                       |                   |                                   | NZ_AMPN01000411.1 |                          |                  |
|                                       |                   |                                   | NZ_AMPN01000174.1 |                          |                  |
| NRPS-independent siderophore synthase | Aerobactin-like   | 1268164..1283196                  | NZ_AMPN01000222.1 |                          |                  |
|                                       |                   |                                   | NZ_AMPN01000095.1 |                          |                  |
| Hopene / Squalene synthase            | Hopanoids         | 308626..335220                    | NZ_AMPN01000054.1 |                          |                  |
|                                       |                   |                                   | NZ_AMPN01000311.1 |                          |                  |
| NRPS                                  | Unknown           | 3553726..3604015                  | NZ_AMPN01000145.1 |                          | CADY01000201.1   |
|                                       |                   |                                   | NZ_AMPN01000217.1 |                          | CADY01000202.1   |
| NRPS                                  | Unknown           | 1136316..1199422                  |                   | NZ_KB890708.1            |                  |
|                                       |                   |                                   |                   | NZ_KB890714.1            |                  |
| Hybrid NRPS / PKS                     | Unknown           | 3011..61711                       |                   |                          | CADY01000116.1   |
|                                       |                   |                                   |                   |                          | CADY01000117.1   |
| Type I PKS                            | Unknown           | 6776680..6838639                  | NZ_AMPN01000106.1 |                          | CADY01000087.1   |
|                                       |                   |                                   | NZ_AMPN01000245.1 |                          | CADY01000089.1   |
